# Supplementary material for: Ultra-long-acting removable drug delivery system for HIV treatment and prevention
Source: PubMed Central journal article supplement (PMC6175887; doi:10.1038/s41467-018-06490-w), 2018-10-08
Supplement: 41467_2018_6490_MOESM1_ESM.pdf [file 41467_2018_6490_MOESM1_ESM.pdf]

**Supplementary information**

**Ultra-long-acting removable drug delivery system for  
HIV treatment and prevention**

**Kovarova et al**

**Supplementary Materials:**

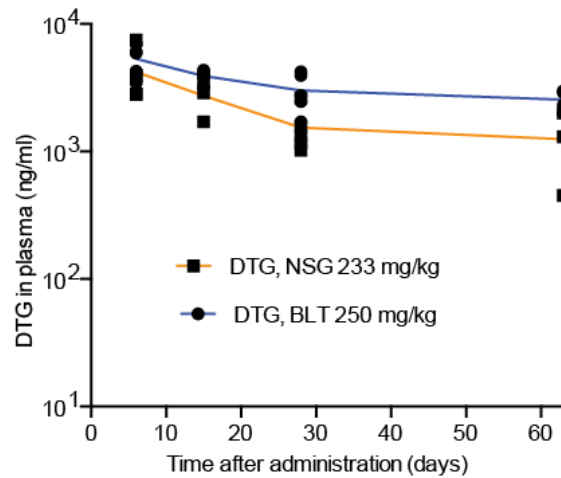

**Supplementary Figure 1: Comparison of pharmacological profiles of ultra-LA DTG in**

**NSG and BLT mice.** NSG (n=3) or BLT (n=5) mice received subcutaneously 233 mg/kg and 250 mg/kg of ultra-long-acting dolutegravir, respectively. Plasma dolutegravir concentration was evaluated longitudinally for 2 months after ultra-long-acting dolutegravir administration.

Concentration of DTG in plasma of individual mice are shown. Experiment was conducted once.

**Supplementary Table 2: Sequences of primers used in the study**

| Use of the primer                                       | Sequence of primer                    |
|---------------------------------------------------------|---------------------------------------|
| Generation of HIV <i>gag</i> cDNA                       | 5'-CTTCCAATTATGTTGACAGGTGTAGG-3'      |
| Nested PCR of <i>gag</i> ; outer forward primer         | 5'-CTCAATAAAGCTTGCCTTGAGTGC-3';       |
| Nested PCR of <i>gag</i> ; outer reverse primer         | 5'-CTTCCAATTATGTTGACAGGTGTAGG-3';     |
| Nested PCR of <i>gag</i> ; inner forward primer         | 5'-GTGTGGAAAATCTCTAGCAGTGGC-3';       |
| Nested PCR of <i>gag</i> ; inner reverse primer         | 5'-CTGTATCATCTGCTCCTGTATCTAATAGAGC-3' |
| Generation of HIV integrase cDNA                        | 5'- GGTCAGGGTCTACTTGTGTGC -3'         |
| Nested PCR of integrase; outer forward primer           | 5'- CCTGAGTGGGAGTTTGTCAATAC -3'       |
| Nested PCR of integrase; outer reverse primer           | 5'- GGTCAGGGTCTACTTGTGTGC -3'         |
| Nested PCR of integrase; inner forward primer           | 5'- AGCACACAAAGGAATTGGAG -3'          |
| Nested PCR of integrase; inner reverse primer           | 5'- GTGGGATTTGTA CT TCTGAAC -3'       |
| Forward primer for HIV-RNA and DNA amplification        | 5'- CATGTTTTTCAGCATTATCAGAAGGA-3'     |
| Reverse primer for HIV-RNA and DNA amplification        | 5'- TGCTTGATGTCCCCCACT-3'             |
| Forward primer for human gamma globin DNA amplification | 5'- CGCTTCTGGAACGTCTGAGATT-3'         |
| Reverse primer for human gamma globin DNA amplification | 5'- CCTTGTCCCTCCTCCTGTGAAATGA -3'     |
